# Supplementary material
Source: Elsevier journal article supplement (https://www.sciencedirect.com/science/article/pii/S1579212920302135)
Supplement: mmc1 [file S1579212920302135:mmc1.pdf]

## Suplemento Online 1

### METODOLOGÍA DE ELABORACIÓN DEL DOCUMENTO DE CONSENSO SOBRE EL DIAGNÓSTICO Y TRATAMIENTO DE LA INFECCIÓN BRONQUIAL CRÓNICA EN LA ENFERMEDAD PULMONAR OBSTRUCTIVA CRÓNICA

Dada la escasez o la heterogeneidad de las evidencias científicas existentes, se consideró que no era adecuado llevar a cabo un documento basado en una revisión de evidencias de alta calidad, con la consiguiente elaboración de recomendaciones clínicas. Por ello, se optó por elaborar un documento de consenso por parte de un amplio grupo de expertos en el manejo de los pacientes con enfermedad pulmonar obstructiva crónica (EPOC). Como paso previo, se solicitó el aval del Comité Científico de la Sociedad Española de Neumología y Cirugía Torácica (SEPAR). Una vez concedido este aval, se configuró por un lado un Comité Científico del documento (formado por cuatro miembros del Área de EPOC, cuatro miembros del Área de Tuberculosis e Infecciones Respiratorias (TIR) de la SEPAR), que con el asesoramiento de un microbiólogo experto fue el encargado de llevar a cabo la revisión bibliográfica y la confección del borrador del documento. Por otro lado, se designó un panel de expertos, encargado de evaluar el borrador, en el que se incluyó a 5 miembros más de cada una de las dos áreas, así como a representantes de cada una de las 14 sociedades autonómicas de neumología (**Tabla 1**). En total el panel de expertos estaba compuesto por 44 personas. El Documento final cuenta con el aval de SEPAR.

La metodología y las fases de elaboración del Documento fueron las siguientes:

#### 1. Selección de los temas a tratar

- Cada uno de los miembros del comité científico propuso un listado de preguntas que consideraba de relevancia clínica, en relación al manejo de los pacientes con EPOC y aislamientos de microorganismos potencialmente patógenos.
- Se recogieron 39 diferentes preguntas, que posteriormente fueron ponderadas por parte de cada uno de los miembros del Comité Científico, puntuando cada una de las propuestas mediante una escala Likert del 1 al 5 (de menor a mayor relevancia).
- Se seleccionaron aquellas preguntas que obtuvieron mayor puntuación, y se agruparon por temas similares.
- Con ello se confeccionaron 10 módulos clínicos, con un número variable de preguntas cada uno.

#### 2. Revisión de la bibliografía

- Se repartieron los módulos a revisar entre los ocho miembros del Comité Científico por parejas, de modo que cada pareja (formada por un miembro del Área TIR y un miembro del Área EPOC) llevó a cabo la revisión de la literatura científica relativa a 2 de los módulos. Los 2 módulos restantes (los referentes a *Definiciones* y a *Tratamiento de la*

*primoinfección*) se decidió que fueran desarrollados por todos los miembros del Comité Científico, ya que abordaban temas sobre los que prácticamente no había evidencia científica.

- Se llevó a cabo una revisión sistematizada de la literatura para cada uno de los módulos asignados (ver **Tabla 2**), y se elaboraron diferentes propuestas clínicas para cada módulo.

### **3. Confección del primer borrador**

- Con las propuestas iniciales se elaboró el primer borrador del documento, que fue revisado y depurado por los miembros del comité científico y el microbiólogo, mediante varias rondas de mensajes por correo electrónico.
- En una reunión presencial que tuvo lugar en Madrid el 23 de octubre de 2019 se elaboró un borrador final limpio que fue aprobado por el comité científico tras una última vuelta por correo electrónico.

### **4. Primera valoración del borrador por parte del Comité Asesor**

- Este primer borrador consensuado fue remitido en una primera ronda Delphi a todos los miembros del comité asesor para su valoración.
- Cada componente del panel puntuó su grado de acuerdo con cada una de las propuestas del documento (en una escala Likert de 1 a 5 puntos, de menor a mayor acuerdo).
- Posteriormente se llevó a cabo una reunión presencial entre el comité científico y el comité asesor, el 23 de noviembre de 2019, coincidiendo con la 27ª Reunión de Invierno Conjunta de las Áreas SEPAR. En esta reunión se discutieron los aspectos más controvertidos del borrador y se propusieron diversas modificaciones del mismo.

### **5. Confección del segundo borrador**

- Tras esa reunión se introdujeron en el documento los cambios propuestos, confeccionando un segundo borrador del documento.

### **6. Segunda valoración por parte del Comité Asesor**

- Este segundo borrador fue nuevamente remitido para su valoración en una segunda ronda Delphi a los miembros del comité asesor. Nuevamente, valoraron su grado de acuerdo con las aseveraciones del documento.

### **7. Elaboración del borrador definitivo**

- La versión final del Documento recoge todas las propuestas y pautas, indicando en cada una el grado de acuerdo con las mismas por parte del comité asesor.

**Tabla 1:** Miembros del Comité Asesor seleccionados por el Área EPOC, el Área de Tuberculosis e Infecciones Respiratorias y por las 14 sociedades autonómicas de Neumología.

Francisco Javier Callejas (Hospital Universitario de Albacete); Ángela Cervera Juan (Hospital General de Valencia); Marta Palop Cervera (Hospital de Sagunto); Antonia Fuster Gomila (Hospital Son Llàtzer); Alicia Marín Tapia (Hospital Germans Trias i Pujol); Xavier Pomares Amigo (Hospital Parc Taulí); Mirian Torres González (Hospital San Pedro de Alcántara); Jacinto Hernández Borge (Hospital de Badajoz); Gerardo Pérez Chica (Hospital Ciudad de Jaén); Rocío Jimeno Galván (Hospital Punta de Europa); Rafael Golpe Gómez (Hospital Lucus Augusti); Pedro J. Marcos Rodríguez (Hospital A Coruña); Pilar Cebollero Rivas (Complejo Hospitalario de Navarra); Eva Tabernero Huguet (Hospital de Cruces); Carlos Álvarez Martínez (Hospital 12 de Octubre); Concha Prados Sánchez (Hospital La Paz); José Javier Martínez Garcerán (Hospital Santa Lucía); Carlos Peñalver Mellado (Hospital Virgen de la Arrixaca); Marta García Clemente (Hospital Central de Asturias); Juan Rodríguez López (Hospital del Oriente de Asturias Francisco Grande Covián); Juan Marco Figueira Gonçalves (Hospital Nuestra Señora de la Candelaria); Guillermo José Pérez Mendoza (Hospital Dr. Negrín); Jesús Hernández Hernández (Hospital Nuestra Señora de Sonsoles); Carlos Amado Diago (Hospital Marqués de Valdecilla); Laura Pérez Giménez (Hospital Royo Vilanova); Virginia Moya Álvarez (Hospital Clínico Lozano Blesa); Alexandre Palou Rotger (Hospital Son Espases); Rosa Girón Moreno (Hospital La Princesa); Marina Blanco Aparicio (Hospital A Coruña); Annie Navarro Rolón (Hospital Mutua de Terrassa); Oriol Sibila (Hospital Clínic de Barcelona); Marc Miravittles Fernández (Hospital Vall d'Hebron); Juan José Soler Cataluña (Hospital Arnau de Vilanova); José Alberto Fernández Villar (Hospital Alvaro Cunqueiro); Germán Peces-Barba Romero (Hospital Fundación Jiménez Díaz).

**Tabla 2:** Criterios empleados para llevar a cabo la revisión sistematizada de la literatura científica en relación a la presencia de MPP en pacientes con EPOC estable.

|                                   |                                                                                                                                                                                                                                                                                                                                                                                                                                                                                                                                                  |
|-----------------------------------|--------------------------------------------------------------------------------------------------------------------------------------------------------------------------------------------------------------------------------------------------------------------------------------------------------------------------------------------------------------------------------------------------------------------------------------------------------------------------------------------------------------------------------------------------|
| <b>Términos MESH</b>              | COPD; COPD and Chronic bronchial infection; bronchial infection; colonization; sputum; sample; sputum bacterial; airway bacterial load; <i>Pseudomonas aeruginosa</i> ; <i>Haemophilus influenzae</i> ; <i>Aspergillus</i> ; <i>Mycobacterium</i> ; Prognostic and Bronchiectasis and COPD; Treatment and Bronchiectasis and COPD; Computed Tomography and COPD; Systematic review COPD and bronchiectasis; clinical management; lower airway infection; microbiologic determinants; macrolides; primary infection (initial infection) treatment |
| <b>Filtros aplicados a Pubmed</b> | <ul style="list-style-type: none"> <li>• Disponibilidad de texto: abstract</li> <li>• Especies: humans</li> <li>• Edad: &gt;19 años</li> </ul>                                                                                                                                                                                                                                                                                                                                                                                                   |
