# Supplementary material
Source: Elsevier journal article supplement (https://www.sciencedirect.com/science/article/pii/S1579212920302135)
Supplement: mmc2 [file S1579212920302135:mmc2.pdf]

**Suplemento online 2:** Requisitos y precauciones a tener en cuenta antes de iniciar tratamiento con macrólidos a largo plazo.

- Pacientes con EPOC estable e IBC con 2 o más agudizaciones/año a pesar del tratamiento de base correcto
- Cumplimiento del régimen actual de fármacos y uso adecuado del inhalador
- Ausencia de alergia a los macrólidos
- Intervalo QT corregido <450 ms en electrocardiografía
- Niveles de aminotransferasa <3 veces el límite superior del rango normal
- Ausencia de disminución de la audición (en caso de duda, llevar a cabo una audiometría formal)
- Cultivo de esputo negativo para micobacterias
- Ausencia de situaciones arritmogénicas<sup>1</sup>:
  - Prolongación del intervalo QT congénito o confirmado
  - Tratamiento prolongado con fármacos que prolonguen el intervalo QT:
    - Antiarrítmicos de clase IA (quinidina y procainamida)
    - Antiarrítmicos de clase III (dofetilida, amiodarona y sotalol)
    - Cisaprida
    - Terfenadina
    - Antipsicóticos como fenotiazidas y pimozida
    - Antidepresivos como citalopram
    - Fluoroquinolonas como moxifloxacino y levofloxacino
  - Alteraciones electrolíticas como hipopotasemia o hipomagnesemia.
  - Bradicardia clínicamente relevante, arritmia cardíaca o insuficiencia cardíaca grave

---

<sup>1</sup>Azitromicina 500. Ficha técnica. Agencia Española del Medicamento y Productos Sanitarios. Madrid: Ministerio de Sanidad; 2019
